1 **Supplemental Figures**

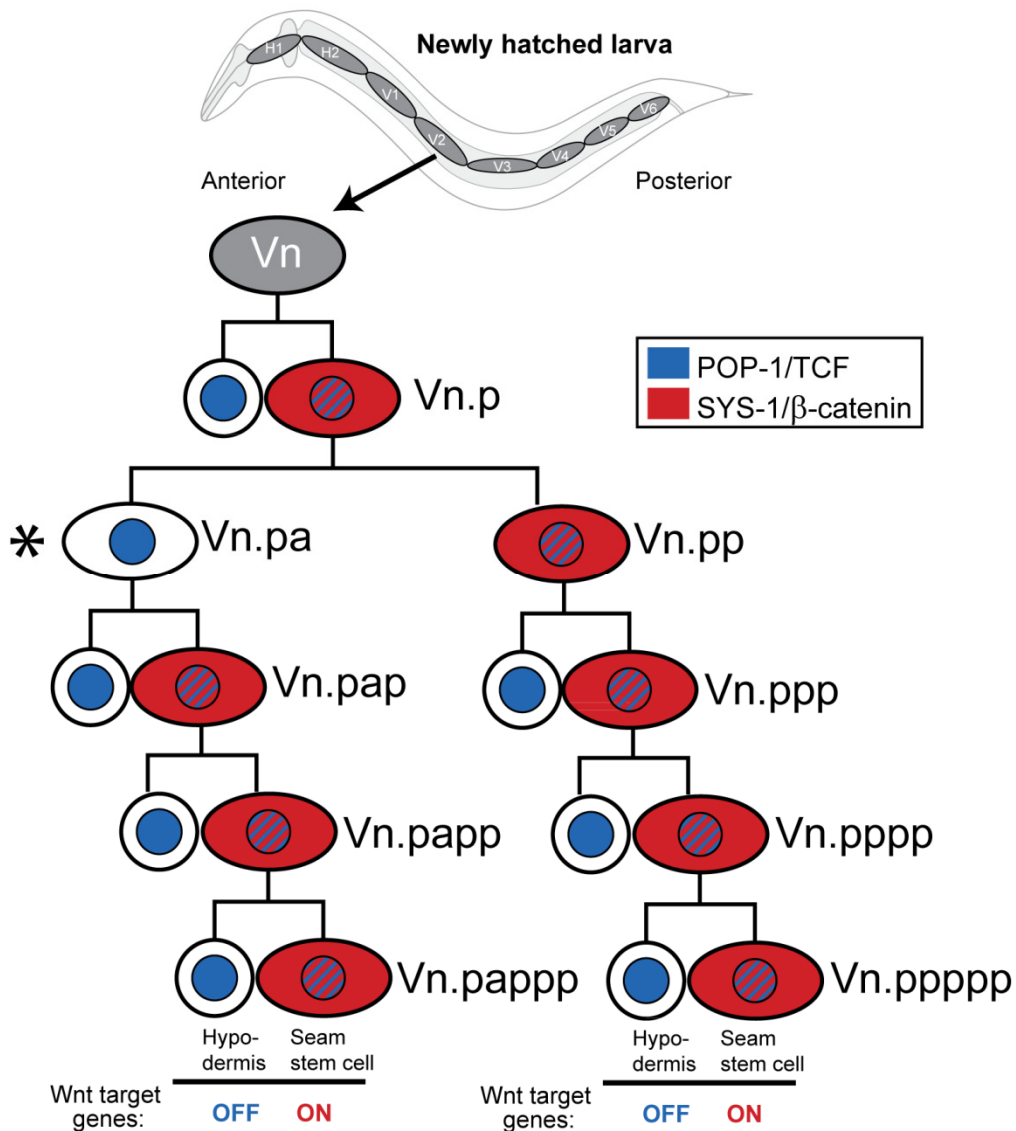

2  
 3 **Fig. S1. The epithelial seam cells divide in a stem cell-like pattern dependent on**  
 4 **the WβA signaling pathway.** Nuclear POP-1/TCF is lowered and SYS-1/β-catenin is  
 5 elevated only in the posterior daughter, which activates Wnt target genes and retains  
 6 the seam stem cell fate. Anterior daughters display a low SYS-1:POP-1 ratio and  
 7 differentiate as hypodermis with the exception of Vn.pa, which remains a seam cell in all  
 8 lineages except V5. Asterisk indicates that this lineage is altered in V5.

9

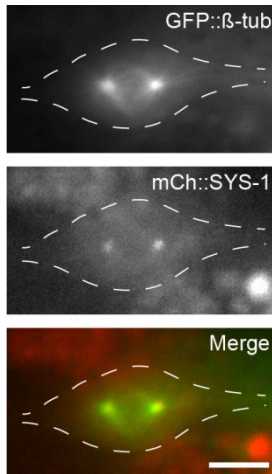

10

11 **Fig. S2. mCherry::SYS-1 colocalizes with GFP::β-tubulin during seam cell**

12 **division.**  $P_{sys-1}::mCherry::SYS-1$  puncta colocalize with  $P_{scm}::GFP::\beta$ -tubulin during  
13 seam cell division, indicating that the SYS-1 puncta are likely centrosomal. Scale bars:  
14 5  $\mu$ m.

15

16

17

18

19

20

21

22

23

24

25

26

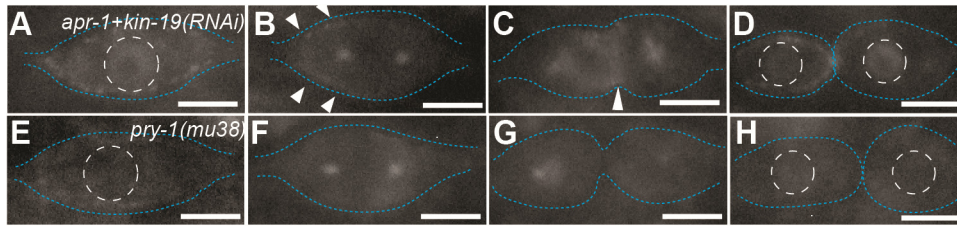

27  
 28 **Fig. S3. *apr-1+kin-19*(double RNAi) resembles the *apr-1*(RNAi) phenotype, and**  
 29 ***pry-1(mu38)* displays defects in the polarity of SYS-1 localization during seam cell**  
 30 **division. A-D, YFP::SYS-1 localization in *apr-1+kin-19*(double RNAi)seam cells.**  
 31 Arrowheads in B and C denote cortical SYS-1 localization. Compare to Figure 2E-L. E-  
 32 H, YFP::SYS-1 localization in *pry-1(mu38)* seam cells. A is a representative images. F-  
 33 H are consecutive images of the same cell during mitosis. The division shown in F-H  
 34 represents a reversal of the polarity of SYS-1 asymmetry versus wild-type (Figure 2).  
 35 White dashed circles denote nuclei. Blue dashed lines denote cell boundaries. Scale  
 36 bars: 5  $\mu$ m.

37  
 38  
 39  
 40  
 41  
 42  
 43  
 44  
 45  
 46  
 47  
 48  
 49  
 50  
 51  
 52  
 53  
 54

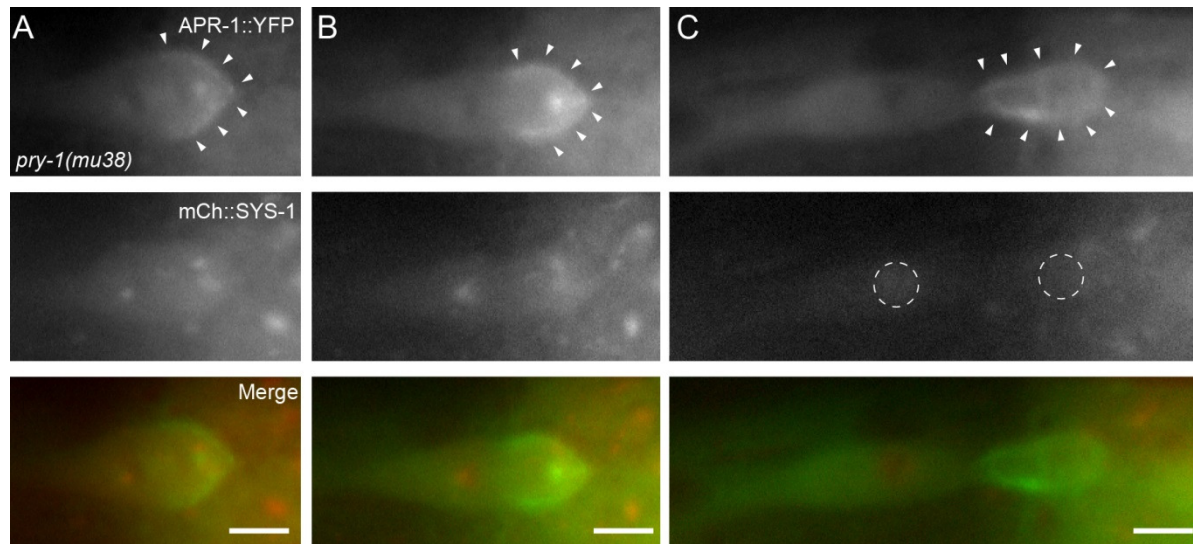

55  
 56 **Fig. S4. Aberrant cortical localization of APR-1–YFP in *pry-1(mu38)* is established**  
 57 **prior to cytokinesis and persists through the end of division.** A, APR-1::YFP and  
 58 mCherry::SYS-1 localization in *pry-1(mu38)* during metaphase. Arrowheads mark  
 59 cortical APR-1::YFP, the polarity of which is already reversed at this stage. B,  
 60 APR-1::YFP cortical asymmetry remains reversed during telophase. C, post-division,  
 61 high levels of cortical APR-1::YFP are maintained in the posterior daughter. White  
 62 dashed circles mark nuclei, which also display reversed SYS-1 asymmetry. Scale bars:  
 63 5  $\mu$ m.

64

65
